# Supplementary material for: Oral magnesium supplementation does not affect insulin sensitivity in people with insulin-treated type 2 diabetes and a low serum magnesium: a randomised controlled trial
Source: PubMed Central journal article supplement (PMC10709477; doi:10.1007/s00125-023-06029-9), 2023-11-03
Supplement: 125_2023_6029_MOESM1_ESM.pdf [file 125_2023_6029_MOESM1_ESM.pdf]

## Electronic supplementary material (ESM)

### ESM Methods: Questionnaire symptoms magnesium

Question 1: In the past three weeks, how often have you suffered from:

|                             | Daily<br>(3 points) | Several days a<br>week<br>(2 points) | Once a week<br>or less<br>(1 point) | Not at all<br>(0 points) |
|-----------------------------|---------------------|--------------------------------------|-------------------------------------|--------------------------|
| Muscle cramps               |                     |                                      |                                     |                          |
| Myalgia                     |                     |                                      |                                     |                          |
| Muscle weakness             |                     |                                      |                                     |                          |
| Stiffness                   |                     |                                      |                                     |                          |
| Tingling                    |                     |                                      |                                     |                          |
| Restless legs               |                     |                                      |                                     |                          |
| Palpitations                |                     |                                      |                                     |                          |
| Fatigue                     |                     |                                      |                                     |                          |
| Sleeping problems           |                     |                                      |                                     |                          |
| Difficulty<br>concentrating |                     |                                      |                                     |                          |

Maximum score: 30

Question 2: In the past three weeks, to what extent have you suffered from:

|                             | Very much<br>(5 points) | Quite a<br>lot<br>(4 points) | Somewhat<br>(3 points) | A little<br>(2 points) | Almost<br>not<br>(1 point) | Not at all<br>(0 points) |
|-----------------------------|-------------------------|------------------------------|------------------------|------------------------|----------------------------|--------------------------|
| Muscle cramps               |                         |                              |                        |                        |                            |                          |
| Myalgia                     |                         |                              |                        |                        |                            |                          |
| Muscle weakness             |                         |                              |                        |                        |                            |                          |
| Stiffness                   |                         |                              |                        |                        |                            |                          |
| Tingling                    |                         |                              |                        |                        |                            |                          |
| Restless legs               |                         |                              |                        |                        |                            |                          |
| Palpitations                |                         |                              |                        |                        |                            |                          |
| Fatigue                     |                         |                              |                        |                        |                            |                          |
| Sleeping<br>problems        |                         |                              |                        |                        |                            |                          |
| Difficulty<br>concentrating |                         |                              |                        |                        |                            |                          |

Maximum score: 50

Question 3: In the past three weeks, to what extent were you limited in your daily activities by:

|                          | Very much<br>(5 points) | Quite a lot<br>(4 points) | Somewhat<br>(3 points) | A little<br>(2 points) | Almost not<br>(1 point) | Not at all<br>(0 points) |
|--------------------------|-------------------------|---------------------------|------------------------|------------------------|-------------------------|--------------------------|
| Muscle cramps            |                         |                           |                        |                        |                         |                          |
| Myalgia                  |                         |                           |                        |                        |                         |                          |
| Muscle weakness          |                         |                           |                        |                        |                         |                          |
| Stiffness                |                         |                           |                        |                        |                         |                          |
| Tingling                 |                         |                           |                        |                        |                         |                          |
| Restless legs            |                         |                           |                        |                        |                         |                          |
| Palpitations             |                         |                           |                        |                        |                         |                          |
| Fatigue                  |                         |                           |                        |                        |                         |                          |
| Sleeping problems        |                         |                           |                        |                        |                         |                          |
| Difficulty concentrating |                         |                           |                        |                        |                         |                          |

Maximum score: 50

**ESM figures**

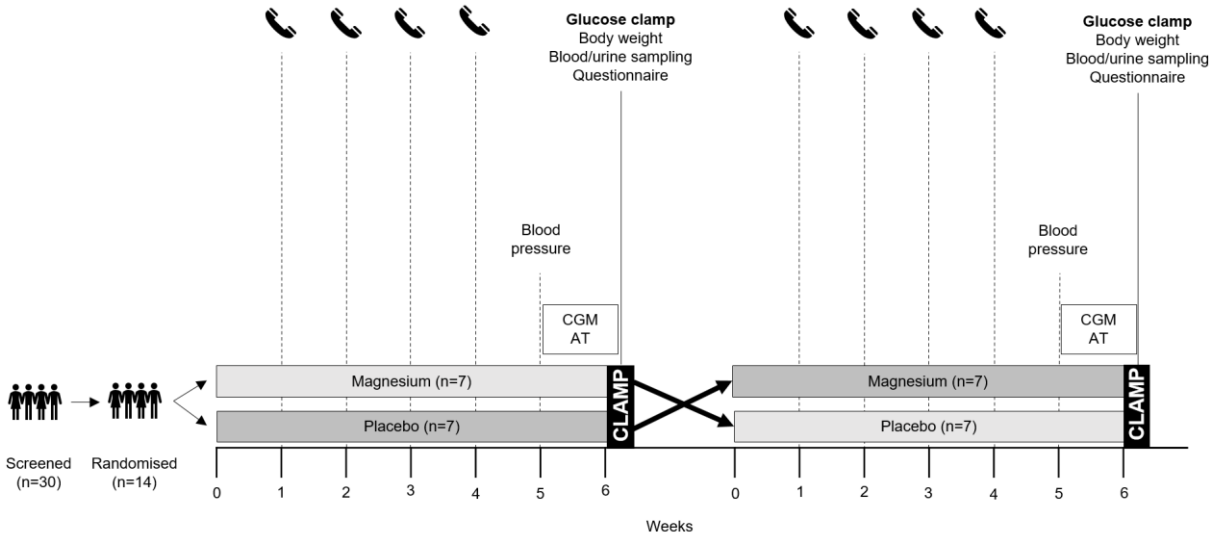

**ESM Fig. 1 – Study design.** CGM = continuous glucose monitoring; AT = activity tracker.

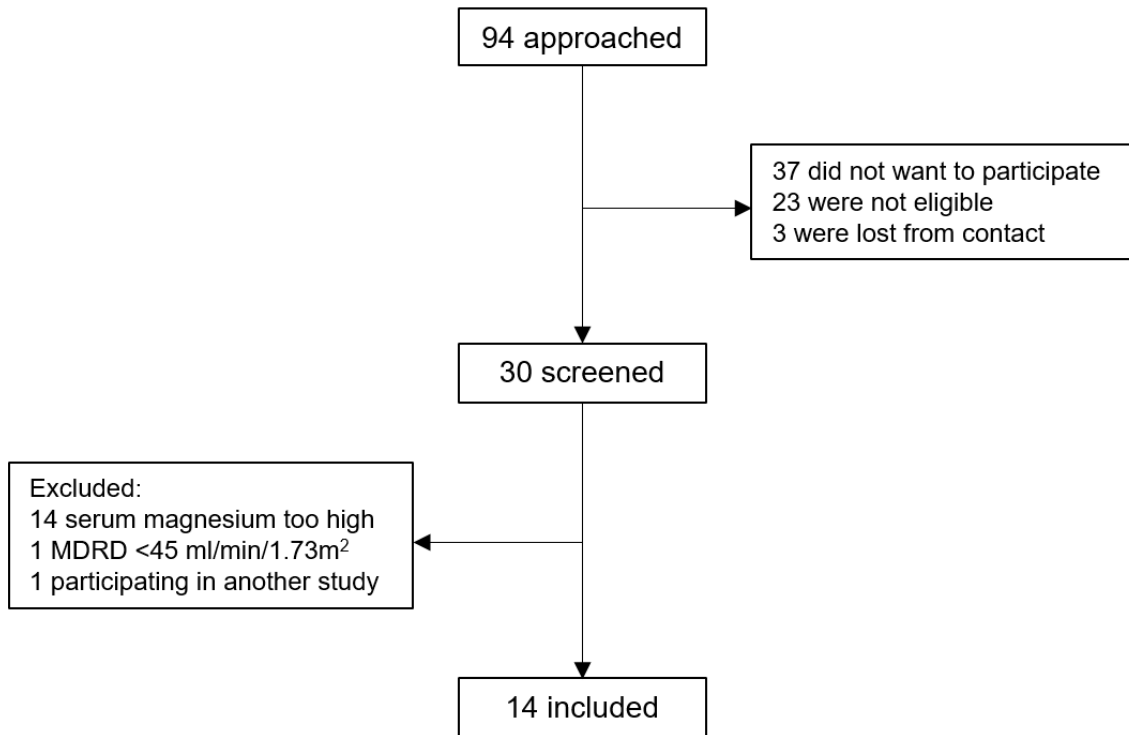

**ESM Fig. 2 – Flowchart.**

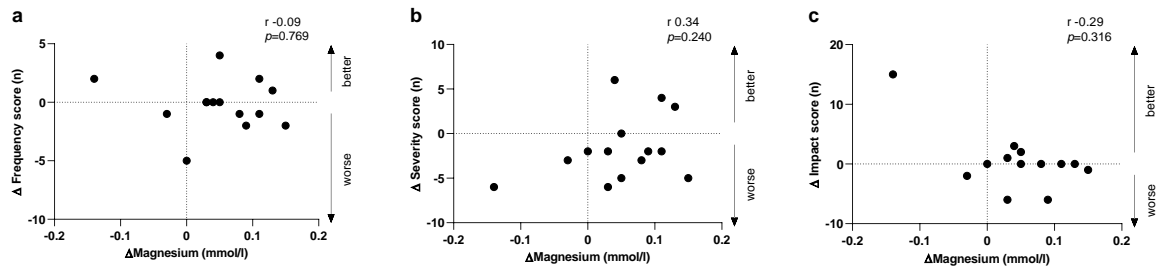

**ESM Fig. 3** – Correlation between the change in serum magnesium concentration and the change in frequency (a), severity (b), and daily-life impact (c) score of hypomagnesemia-related symptoms after magnesium compared to placebo treatment. Data are presented as individual values.
